# 1 **Integration of absolute multi-omics reveals translational and** 2 **metabolic interplay in mixed-kingdom microbiomes.**

3

4 F. Delogu<sup>1</sup>, B.J. Kunath<sup>1,2</sup>, M.Ø. Arntzen<sup>1</sup>, T.R. Hvidsten<sup>1</sup>, P.B. Pope<sup>1,3</sup>

5

6 <sup>1</sup> Faculty of Chemistry, Biotechnology and Food Science, Norwegian University of Life Sciences, 1432  
7 Ås, Norway

8 <sup>2</sup> Luxembourg Centre for Systems Biomedicine, Université du Luxembourg, L-4362 Esch-sur-Alzette,  
9 Luxembourg

10 <sup>3</sup> Faculty of Biosciences, Norwegian University of Life Sciences, 1432 Ås, Norway

11

12 Corresponding authors:

13 Phillip B. Pope [phil.pope@nmbu.no](mailto:phil.pope@nmbu.no)

14 Francesco Delogu [delogu.francesco@nmbu.no](mailto:delogu.francesco@nmbu.no)

15

## 16 **Abstract**

17 Microbiology is founded on well-known model organisms. For example, the majority of our  
18 fundamental knowledge regarding the quantitative levels of DNA, RNA, and protein backdates to  
19 keystone pure culture-based studies. Nowadays, meta-omic approaches allow us to directly access the  
20 molecules that constitute microbes and microbial communities, however due to a lack of absolute  
21 measurements, many original culture-derived “microbiology statutes” have not been updated or  
22 adapted to more complex microbiome settings. Within a cellulose-degrading and methanogenic  
23 consortium, we temporally measured genome-centric absolute RNA and protein levels per gene, and  
24 obtained a protein-to-RNA ratio of  $10^2$ - $10^4$  for bacterial populations, whereas Archaeal RNA/protein  
25 dynamics ( $10^3$ - $10^5$ : *Methanothermobacter thermoautotrophicus*) were more comparable to Eukaryotic  
26 representatives humans and yeast. The linearity between transcriptome and proteome had a population-  
27 specific change over time, highlighting a minimal subset of four functional carriers (cellulose degrader,  
28 fermenter, syntrophic acetate-oxidizer and methanogen) that coordinated their respective metabolisms,  
29 cumulating in the overarching community phenotype of converting polysaccharides to methane. Our  
30 findings show that upgrading multi-omic toolkits with traditional absolute measurements unlocks the

- 31 scaling of core biological questions to dynamic and complex microbiomes, creating a deeper insight
- 32 into inter-organismal relationships that drive the greater community function.

## 33 **Introduction**

34 The foundations of microbiology have been built within the constrained framework of pure culture  
35 studies of model organisms that are grown under controlled steady state conditions. However, we are  
36 constantly told that microorganisms grown in artificial isolate conditions behave in a different manner  
37 than what they do in a more natural community setting. For example, when *Escherichia coli* is grown  
38 axenically in steady state, we can expect that each RNA molecule results in  $10^2$  to  $10^4$  of the  
39 corresponding protein (protein-to-RNA ratio) and the variation in the level of cellular RNA explains  
40 ~29% of the variation in the amount of detectable protein<sup>1</sup>. Yet does this notion hold true when a given  
41 bacterial population is part of a larger community and subject to transitions from one state of  
42 equilibrium to another due to limiting and/or confronting environmental factors? In this context, the  
43 exploration of temporal interplay between populations with different lifestyles (comprising  
44 metabolism, motility, sporulation, etc.) becomes of primary importance to interpret the changes in  
45 fundamental quantities in a microbial community, such as the protein-to-RNA ratio that ultimately  
46 impacts the overarching community phenotype(s). In order to perform studies of such design and test if  
47 previously defined quantitative data about the functioning of microbes (i.e. protein-to-RNA ratio) is  
48 applicable to real world consortia, we must first sample microbial communities across transition events  
49 and employ quantification techniques that are absolute.

50  
51 Meta-omics techniques, such as metagenomics (MG)<sup>2,3</sup>, metatranscriptomics (MT)<sup>4</sup> and  
52 metaproteomics (MP)<sup>5</sup> are routinely used to access prokaryotes in the natural world, where they are  
53 part of communities that are frequently dominated by as-yet uncultivated populations<sup>6</sup>. The quantities  
54 retrieved from the meta-omics are usually expressed in relative terms, which makes comparison  
55 between samples and between omic layers inaccurate<sup>7,8</sup>. Moreover, within dynamic data measurements,  
56 such as the MT or MP, the notion of steady state becomes relevant as it is extremely rare that  
57 parameters (e.g. bacterial growth rate and nutrient availability) are stable over time<sup>8</sup>.

58  
59 Here, we present an absolute temporal multi-omic analysis of a minimalistic biogas-producing  
60 consortium (SEM1b), which was resolved at the strain level and augmented with two strain isolates<sup>9</sup>.  
61 We combined both a RNA-spike-in for MT<sup>10,11</sup> and the *total protein approach* for MP<sup>12</sup> for the absolute  
62 quantification of high-throughput data. We not only demonstrate that temporal SEM1b samples were  
63 comparable within the same omic layer, but also between the MT and MP. Indeed, the protein-to-RNA  
64 ratio per sample of the bacterial populations matched previous calculations for the existing example

65 from axenically cultured *E.coli*<sup>1</sup>. For the first time, we present protein-to-RNA ratios for the Archaeal  
66 kingdom (*Methanothermobacter thermoautotrophicus*), which are similar to those reported for the  
67 Eukarya, and support crystallography and homology studies that suggest the translation system of  
68 archaea more closely resembles eukaryotes<sup>13</sup>. Our approach enabled us to explore the linearity of the  
69 protein-to-RNA ratio and if it is influenced by changes in community state and/or specific population  
70 lifestyle. Finally, we estimated the translation and protein degradation rates, showing that a  
71 downregulation of the former marks main lifestyle changes (e.g. motility/chemotaxis and metabolism)  
72 during the community development.

73

## 74 **Results and Discussion**

### 75 **Taxonomic and functional resolution of the omics**

76 In order to characterize RNA/protein dynamics in a microbiome setting, we first needed to molecularly  
77 reconstruct our test community over time. Previous analysis of the simplistic SEM1b community  
78 genomically reconstructed and resolved 11 metagenome assembled genomes (MAGs) as well as two  
79 isolate genomes<sup>9</sup>, covering the taxonomic and functional niches that are required to convert cellulosic  
80 material to methane/CO<sub>2</sub> in an anaerobic biogas reactor<sup>14</sup>. Taxonomic analysis of SEM1b inferred  
81 population-level affiliations to *Rumini*(*Clostridium*) *thermocellum* (RCLO1), *Clostridium* sp. (CLOS1),  
82 *Coprothermobacter proteolyticus* (COPR1, BWF2A, SW3C), *Tepidanaerobacter* (TEPI1-2),  
83 *Synergistales* (SYNG1-2), *Tissierellales* (TISS1), and *Methanothermobacter* (METH1)<sup>9</sup>. Herein we  
84 estimated that the total genomic potential of SEM1b includes 39144 Open Reading Frames (ORFs)  
85 (Supplementary Table 1). Since ORFs with very high sequence similarity may produce RNAs and  
86 proteins that are indistinguishable in MT and MP data, we instead gathered all ORFs into ORF-groups  
87 (ORFGs), where a singleton ORFG is defined as a group with a single ORF, and thus a single gene.  
88 Using this approach, our MT and MP data identified 12552 (96% singleton) and 3235 (78% singletons)  
89 highly transcribed and translated ORFGs, respectively. The discrepancy between the singleton  
90 percentages was as expected, due to the fact that variations in the DNA/RNA sequences are expected to  
91 be greater than in the protein since different codons can code for the same amino acid (codon  
92 degeneracy). Degeneracy implies that the chance to distinguish between homologous genes using MT  
93 is greater than using MP. Previous MG analyses using assembly algorithms has shown that problematic  
94 genomic regions in a given environmental contig can harbor variants from multiple, closely-related  
95 strains, which can be further linked to normal strain-level variability within a population and  
96 speciation<sup>15-17</sup>. Within SEM1b, the ORFGs that contained multiple homologous ORFs predominantly

97 originated from several strains of a single species. For example, in the MT, 444 non-singleton ORFGs  
98 (88% of the total) contained ORFs from different strains of the same species, whilst this was the case  
99 for 294 ORFGs (32%) in the MP.

100

101 All ORFs were annotated using Kegg Ontology (KO), and at least one term was found for 19070 (49%)  
102 representatives from our complete dataset (Supplementary Table 2). The predominant ORF annotations  
103 included *Membrane transport*, *Carbohydrate metabolism*, *Translation*, *Amino acid metabolism* and  
104 *Replication and repair* (Supplementary Fig. 1). As expected, these functional categories were also  
105 among the top five most abundant for the MT, and top six in MP (plus *Energy metabolism*), although in  
106 a different order. The *Membrane transport* category is extremely poorly represented in the MP (2% of  
107 the terms), which is likely explained by well-known technical issues that limit the extraction of  
108 transmembrane proteins<sup>18</sup>. The most abundant annotation categories mentioned above are all in line  
109 with the community function of cellulose degradation. The abundance ranking of the KO categories  
110 changes slightly from MG to MT (Kendall tau: 0.77,  $p < 10^{-8}$ ) and from MT to MP (tau 0.74,  $p < 10^{-6}$ )  
111 whilst moderately from MG to MP (tau 0.68,  $p < 10^{-5}$ ), which means that the functional potential  
112 observed in the genomes is more preserved in the diversity of produced transcripts than the one of  
113 proteins and thus hints to post-transcriptional regulation playing an important role in addition to  
114 transcriptional regulation in prokaryotes.

115

## 116 **Absolute quantification extends expectation from *E.coli* RNA/protein dynamics and positions**

### 117 **Archaea alongside the Eukarya**

118 To determine whether or not microbial RNA/protein dynamics vary between ecological status (isolate  
119 vs community), metabolic states and/or taxonomic phylogeny, we quantified and resolved the numbers  
120 of transcript and protein molecules per sample in our SEM1b community, which averaged  $3.8 \times 10^{12}$  (sd  
121  $3.0 \times 10^{12}$ ) and  $2.2 \times 10^{15}$  (sd  $9.5 \times 10^{14}$ ), respectively (Supplementary Tables 3-4). Microbial cell volume  
122 and its transcriptome size has been shown to change in yeast according to cell status (proliferation vs.  
123 quiescence), whilst the proteome is merely reshaped in its composition<sup>19</sup>. In our case, the number of  
124 total transcripts per SEM1b sample increased more than three-fold during the first 15 hours (from  
125  $\sim 1.2 \times 10^{12}$  in t1 to  $\sim 4.0 \times 10^{13}$  in t4) in the SEM1b consortium's life cycle and then decreased sharply,  
126 whereas the number of proteins per sample reached a plateau after 18 hours post-inoculation at  
127  $\sim 2.7 \times 10^{15}$  molecules. SEM1b approximated the exponential growth phase in t3 (18 hours), therefore we  
128 used the protein-to-RNA ratio from this time point for comparison against previously reported axenic  
129 estimates<sup>1,20-23</sup>. The replicate-averaged protein-to-RNA ratio for the bacteria in SEM1b ranges from

130  $\sim 10^2$  to  $10^4$  (median = 949, Fig. 1a), which fits the estimated range reported for *E.coli*<sup>1</sup>. This means that  
 131 for every RNA molecule one can expect from 100 to 10000 protein molecules with a value of 949  
 132 being the most likely. Our results showed a taxon-specific variation in the protein-to-RNA ratio within  
 133 bacteria (Fig. 1a). Indeed the median ratios for the bacteria in SEM1b at 18h ranged from 658 in  
 134 CLOS1 to 1137 in RCLO1. Moreover, we report, for the first time, the median protein-to-RNA ratio  
 135 for an Archaeal organism: METH1 (*M. thermoautotrophicus*) as being 12035 protein molecules per  
 136 detected RNA (Fig. 1a). The reported values for Eukaryotes are 4200-5600 for yeast<sup>20,21</sup> and 2800-9800  
 137 for *Homo sapiens*<sup>22,23</sup>; therefore, we find that Archaeal translation dynamics are closer to that observed  
 138 within the Eukaryotic kingdom than that of bacteria.  
 139

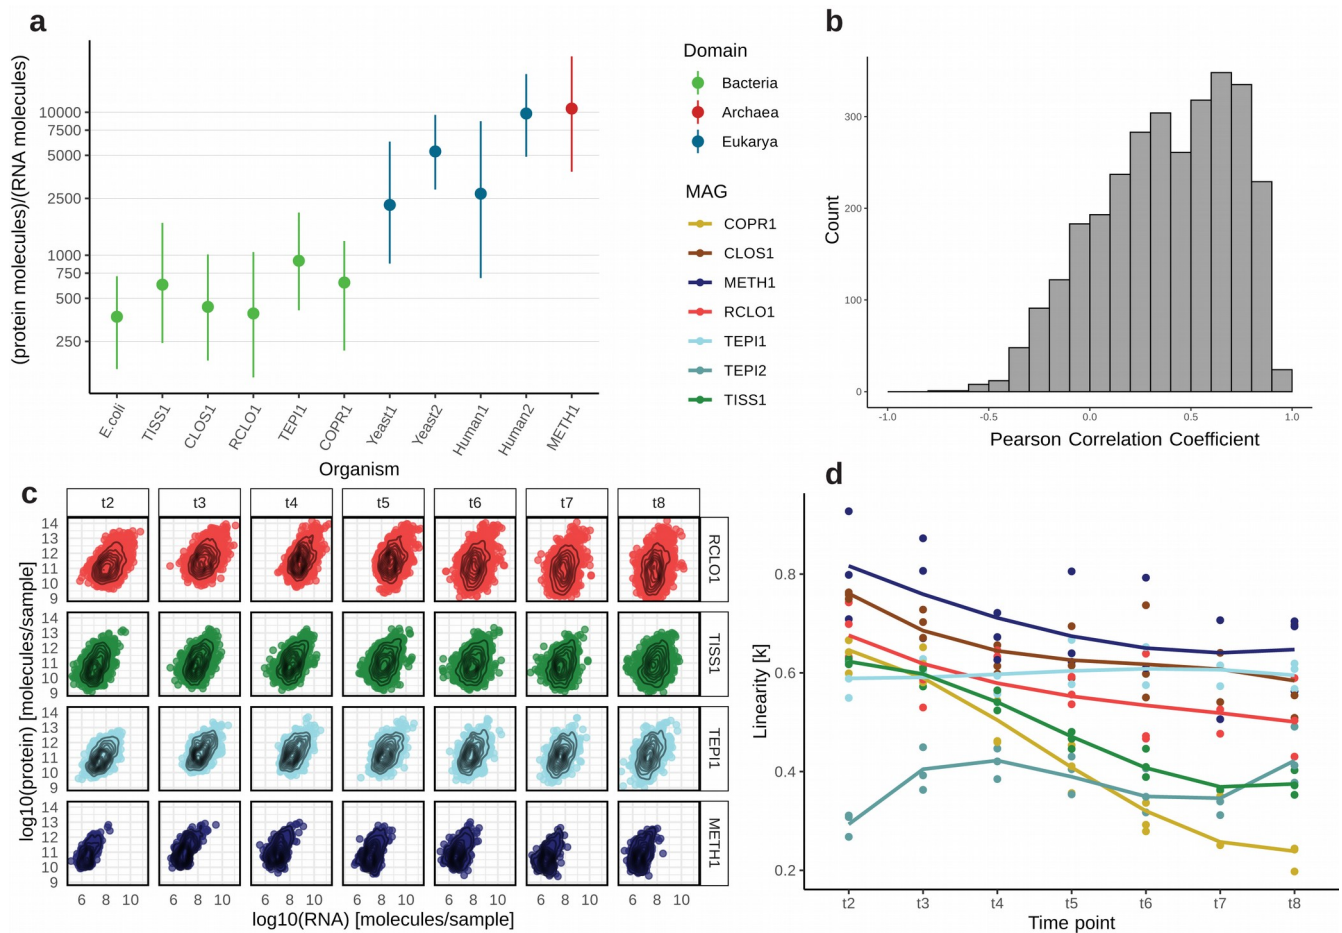

141 **Figure 1. Protein-to-RNA ratio distributions of as-yet uncultured bacterial and archaeal populations within a microbial**  
 142 **community a.** Comparison of protein-to-RNA ratio distributions of selected MAGs reconstructed from the SEM1b community as well as  
 143 those previously reported in the literature. The dots represent the median values and the bars span from the first to the third quartiles. The  
 144 protein-to-RNA ratios for *E.coli* was retrieved from Taniguchi et al.<sup>1</sup>, Yeast1 from Ghaemmaghani et al.<sup>20</sup>, Yeast2 from Lu et al.<sup>21</sup>,  
 145 Human1 from Schwanhausser et al.<sup>22</sup> and Human2 from Li et al.<sup>23</sup>. **b.** The distribution of the Pearson Correlation Coefficients (PCC)  
 146 between transcripts and their corresponding proteins computed across the time points. With a median PCC of 0.41, the change in the  
 147 amount of a given transcript over time seemingly does not translate into a change in the amount of the corresponding protein. **c.** Per-time-  
 148 point scatterplots of the absolute protein and transcript levels for ORFs that produced both detectable transcript and protein in SEM1b  
 149 datasets. For simplicity, only four representative MAGs are shown, with all MAGs depicted in Supplementary Fig. 2. **d.** The plot shows



150 how the linearity parameter  $k$  between RNA and protein changes over time for the different MAGs. The linearity represents how a change  
151 in RNA level is reflected in a change in the corresponding protein level. The parameter ranges from 0 to 1, and increasingly smaller  
152 values translate in fewer proteins being expected for the same level of RNAs. The populations CLOS1, METH1 and TEPI1 are  
153 converging towards the same values, while RCLO1 has a parallel trend. Hinting to the existence, and the reaching of an equilibrium  
154 among them.

155

156 A bacterial cell is considered to be in steady state during the log phase of its growth cycle<sup>8,24,25</sup>,  
157 specifically when the changes in proteome size are believed to be mainly dictated by a change in the  
158 transcriptome<sup>26</sup>. In contrary to these assumptions, comparisons of RNA and protein levels between  
159 individual cells of *E. coli* grown at steady state have not been shown to correlate, however patterns do  
160 emerge when all cells are collectively considered at the population level<sup>1</sup>. In SEM1b, we wanted to see  
161 if correlations between RNA and protein levels exist in a larger microbial community, and if they are  
162 affected by changes in time and life stages. We calculated gene-wise Pearson Correlation Coefficients  
163 (PCCs) of protein and transcripts over time for all SEM1b populations and showed that the PCC value  
164 varied greatly (Fig. 1b) with a median of 0.41, suggesting that no direct correlations between RNA and  
165 proteins levels exist at any stage in a microbiome and that it is nearly impossible to predict the level of  
166 the given protein based on the level of the corresponding transcript.

167

168 Looking at relationships between proteome and transcriptome for individual populations within SEM1b  
169 (examples form four populations in Fig. 1c) was observed to follow a more predicable relationship,  
170 which can be described by the monomial function:

171

$$protein = a \cdot RNA^k \text{ (eq.1)}$$

172 The formula for log10-transformed RNA and protein levels takes the form of a linear model (see  
173 methods) that was fitted to protein and RNA distributions per time point from MAGs with the highest  
174 quality (RCLO1, CLOS1, COPR1, TISS1, TEPI1, TEPI2 and METH1) (Fig. 1d). The linearity  
175 parameter  $k$  can be interpreted as the rate of which a change in RNA level is reflected in a change in  
176 the corresponding protein level. For example, if  $k=1$ , a doubling in RNA level means a doubling in  
177 protein level, whereas if  $k=0.5$  a doubling in RNA level means a ~40% increase in protein level.  
178 Ranging from 0 to 1, it implies that, in the “perfect” condition where  $k=1$ , the number of proteins is  
179 linked to the number of RNAs by the scalar constant  $a$ , whilst if  $k$  approaches 0, there will be much  
180 lower expected protein levels for the same number of RNAs. With the exception of TEPI2, the linearity  
181 ( $k$ ) between protein and RNA levels was observed to start at values between 0.6 and 0.8 at 13 hours ( $t_2$ )  
182 (Fig. 1d). The evolution of the MAGs’  $k$  values over time is then divided in three groups: one which is  
183 losing linearity rapidly (TISS1 and COPR1); one which is slowly declining (RCLO1, CLOS1 and  
184 METH1) and one which is staying constant if not increasing (TEPI1 and TEPI2) (Fig. 1d). Notably

185 CLOS1, METH1 and TEPI1 are converging towards the same linearity values, while RCLO1 has a  
186 parallel trend to them. If these trends can be used to retro-fit the steady state definition, we can  
187 hypothesize that these four populations possess a metabolic equilibrium and that this equilibrium is  
188 approximately reached within the 10 hour window between 33h and 43h (t6 and t7 respectively, Fig.  
189 1d).

190

### 191 **Interpretation of functional specialization in the light of RNA-protein dynamics**

192 Using multi-omic data and the above described RNA-protein dynamics, we were able to visualize that  
193 at least four populations within SEM1b converge upon a dominant metabolic state that we speculate to  
194 strongly shape the overall SEM1b community phenotype and suggest a functional co-dependence  
195 between the individual populations. To determine if this was the case, we annotated the genes and  
196 metabolic pathways for SEM1b MAGs (Fig. 2) and reconstructed their temporal expression patterns  
197 (Fig. 3). The SEM1b consortium is able to convert cellulose (and hemicellulose) to methane via the  
198 combined metabolism of its seven major constituent populations (Fig. 3a). Based on previous analysis  
199 that showed that RCLO1 is closely related to *R. thermocellum*<sup>9</sup>, we predict that it senses<sup>27</sup> its growth  
200 substrate (cellulose) and moves towards it (Fig. 3d). RCLOS1 then transcribes, translates and secretes  
201 the components of the cellulosome, such as scaffoldins, dockerins and carbohydrate-active enzymes  
202 (CAZymes)<sup>28</sup>, which assemble into a dynamic multi-proteins complex that degrades the substrate to  
203 smaller carbohydrates. Via the MG, we predicted that non-cellulosomal CAZymes were also employed  
204 by the *Clostridium*-affiliated CLOS1, which acted upon the hemicellulose fraction (mainly xylan)  
205 trapped in the spruce cellulose, which was supported by observed release of its main monomer xylose  
206 (Fig. 3a). Sugars generated via the actions of RCLO1 and CLOS1 are subsequently consumed by  
207 RCLO1, CLOS1 and *Coprothermobacter*-affiliated populations (COPR1, BWF2A and SW3C), which  
208 were all observed to express sugar transporters (Fig. 2). Notably CLOS1 has the most diversified  
209 transporters, making it a flexible consumer, and for the most part demonstrated highest levels of  
210 hydrolytic and fermentative gene expression after RCLO1, which again is likely tied to xylose release  
211 at later stages of the SEM1b lifecycle (Fig. 3a). However, some of the transporters, such as the one for  
212 oligogalacturonide, raffinose/stachyose/melibiose and rhamnose, were not expressed, likely due to the  
213 absence of their substrates in the largely cellulose and xylan dominated spruce wood used in this study.  
214 CLOS1 was also the only population to possess the aldouronate transporter with 20 copies of gene  
215 *lplA*, 20 of *lplB* and 16 of *lplC* (20/20/16) and expressing  $0.4/0.7/3.8 \times 10^{10}$  and  $92.8/3.5/7.0 \times 10^{11}$   
216 combined median transcripts and proteins per sample; making it one of the few transporters detectable  
217 at the protein level. Similarly, the *C. proteolyticus* strains (BWF2A and SW3C) possess and express



218 unique sugar transporters, likely gaining access to an undisputed pool of arabinogalactan or  
 219 maltooligosaccharide. The transporter for pentamers ribose/xylose were the most common and  
 220 possessed by RCLO1, *C. proteolyticus* populations and *Tepidanaerobacter* populations (TEPI1 and  
 221 TEPI2). Notably from Fig. 2, it is clear that the proteins from the transporters are almost never found in  
 222 the samples, even if the respective RNAs are abundant. This is likely due to the difficulties in  
 223 extracting transmembrane proteins<sup>18</sup>.  
 224

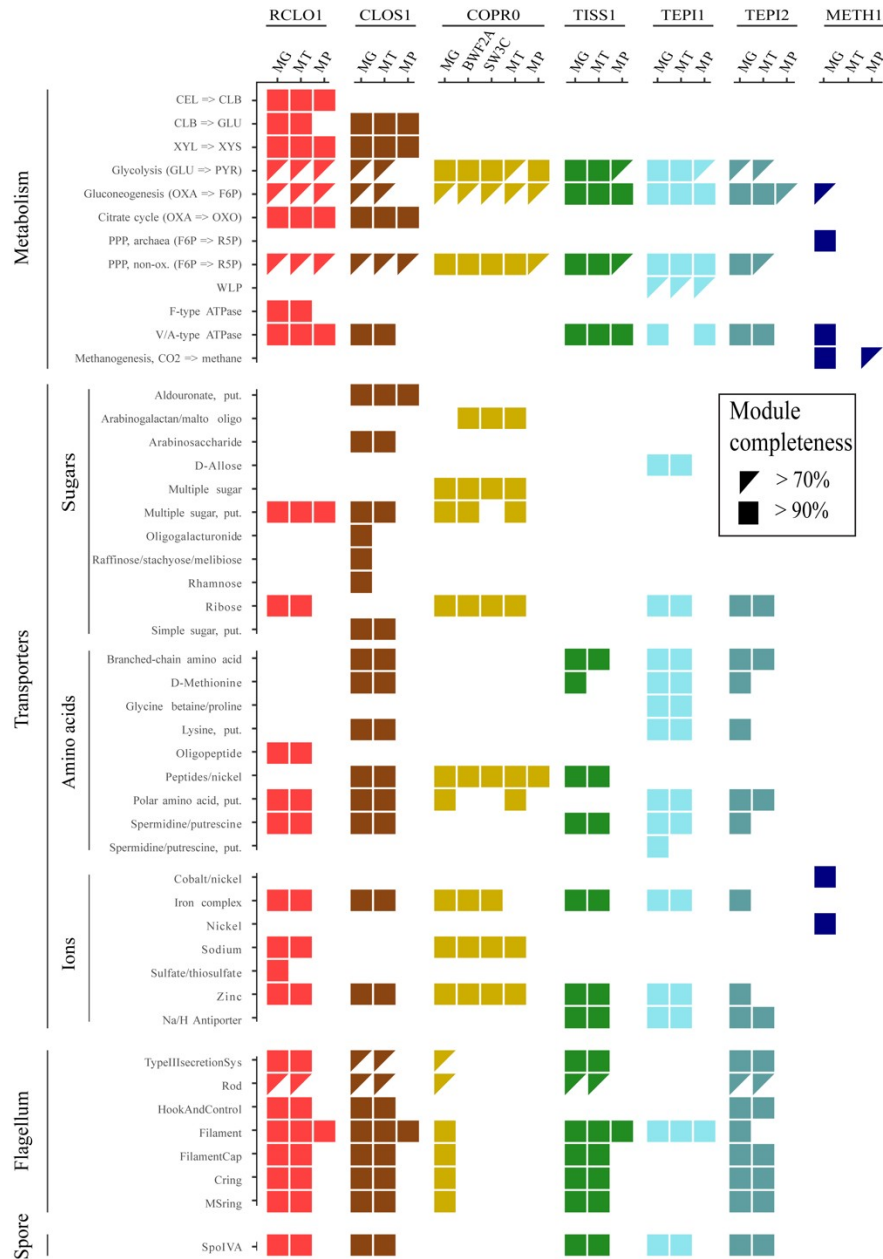

225  
 226 **Figure 2. Overview of the genetic potential and expressed modules in the seven populations of SEM1b.** Module completeness  
 227 denotes the level of detected RNA and proteins mapped to major genes/metabolic pathways that are critical to the SEM1b lifecycle. Only  
 228 MAGs with the highest quality reconstruction (RCLO1, CLOS1, COPR1, TISS1, TEPI1, TEPI2 and METH1) are included as well as two  
 229 isolated and genome-sequenced *Coprothermobacter* strains, for which the transcriptome and the proteome were considered as the species  
 230 level.

231

232 The process of degrading cellulose and simple saccharides via hydrolysis and fermentation ultimately  
233 results in the production of short chain fatty acids (SCFAs) such as propionate, butyrate and acetate,  
234 which are subsequently metabolized by the SCFA-oxidizing populations in SEM1b (TISS1, TEPI1,  
235 TEPI2) (Fig. 3a). The only metabolically-active SCFA-oxidizing population in SEM1b was predicted  
236 to be TEPI1, as it demonstrated good linearity between protein and RNA levels that increased over  
237 time (Fig. 1d) and harbored a complete Wood-Ljungdahl Pathway (WLP) that was detectable in both  
238 MT and MP (Fig. 2). It has been shown that oxidizers can improve oxidization of SCFAs (up to double  
239 speed) when superior NADPH and ATP generators (e.g. glucose) are consumed in small amounts to  
240 complement the stoichiometry through the Pentose Phosphate Pathway (PPP) without triggering the  
241 shift of the entire cells metabolism toward another substrate<sup>29</sup>. In this context, it is interesting to note  
242 that TEPI1 was the only MAG that encoded and expressed a hexose (allose) transporter (Fig. 2).  
243 Aldohexoses (such as D-allose, D-glucose, D-mannose, etc.) are imported and transformed into  
244 fructose-6P in two reactions (both expressed in TEPI1), which can then be fed into both the PPP or the  
245 Glycolysis pathways. Xylose, is a product of the degradation of hemicellulose present in our system  
246 (Fig. 3a) and can be converted to ribulose-5P and fed to the PPP in three reactions. This data, in  
247 combination with a highly expressed and detectable WLP over time (Fig. 3a), points to the  
248 establishment of TEPI1 as the only syntrophic acetate-oxidizer (SAO) in the SEM1b consortium. We  
249 speculate that TEPI1's SAO-metabolism is helped by the other SEM1b populations that generate  
250 acetate as a fermentation end-product and the supplement of the sugars released by the cellulosomal  
251 complex such as glucose and xylose. Interestingly the closely related MAG TEPI2 was observed to  
252 lack the WLP and to express ~10 times more transcripts for the ribose/xylose transporter than TEPI1;  
253 relegating it to the role of mere sugar degrader, and probably scavenger in the community.

254

255 While TISS1 seems mostly to phase out of the community and lose linearity in its protein to transcript  
256 relationship (Fig. 1d), TEPI2 implements an exit strategy in the form of sporulation. All the gram-  
257 positive populations from the SEM1b consortium (RCLO1, CLOS1, TISS1, TEPI1 and TEPI2) were  
258 able to produce spores and express the spore marker *spoIV*, an ATPase associated to the surface of the  
259 neospore that promotes the assembly of the coating and is common to all the spore forming  
260 bacteria<sup>30</sup> (Fig. 3b). TEPI2 however increased the level of transcripts for *spoIV* by 1000 times within  
261 the 13h and the 18h time points, reaching the maximum at 23h, and having a production 10 times  
262 higher than the phylogenetically related TEPI1. All SEM1b populations, except the *C. proteolyticus*  
263 isolates and TEPI1, have the genetic potential for flagellar synthesis but the respective transcripts were

264 only observed for RCLO1, CLOS1, TISS1 and TEPI2. The filament protein of RCLO1 is by far the  
 265 most abundant protein in the samples with an average of  $2.8 \times 10^{13}$  molecules per sample, which  
 266 matches the idea of RCLO1 investing in motility to reach the cellulose fibers and starting with the  
 267 highest level of marker *flgD* in the community (Fig. 3d).

268

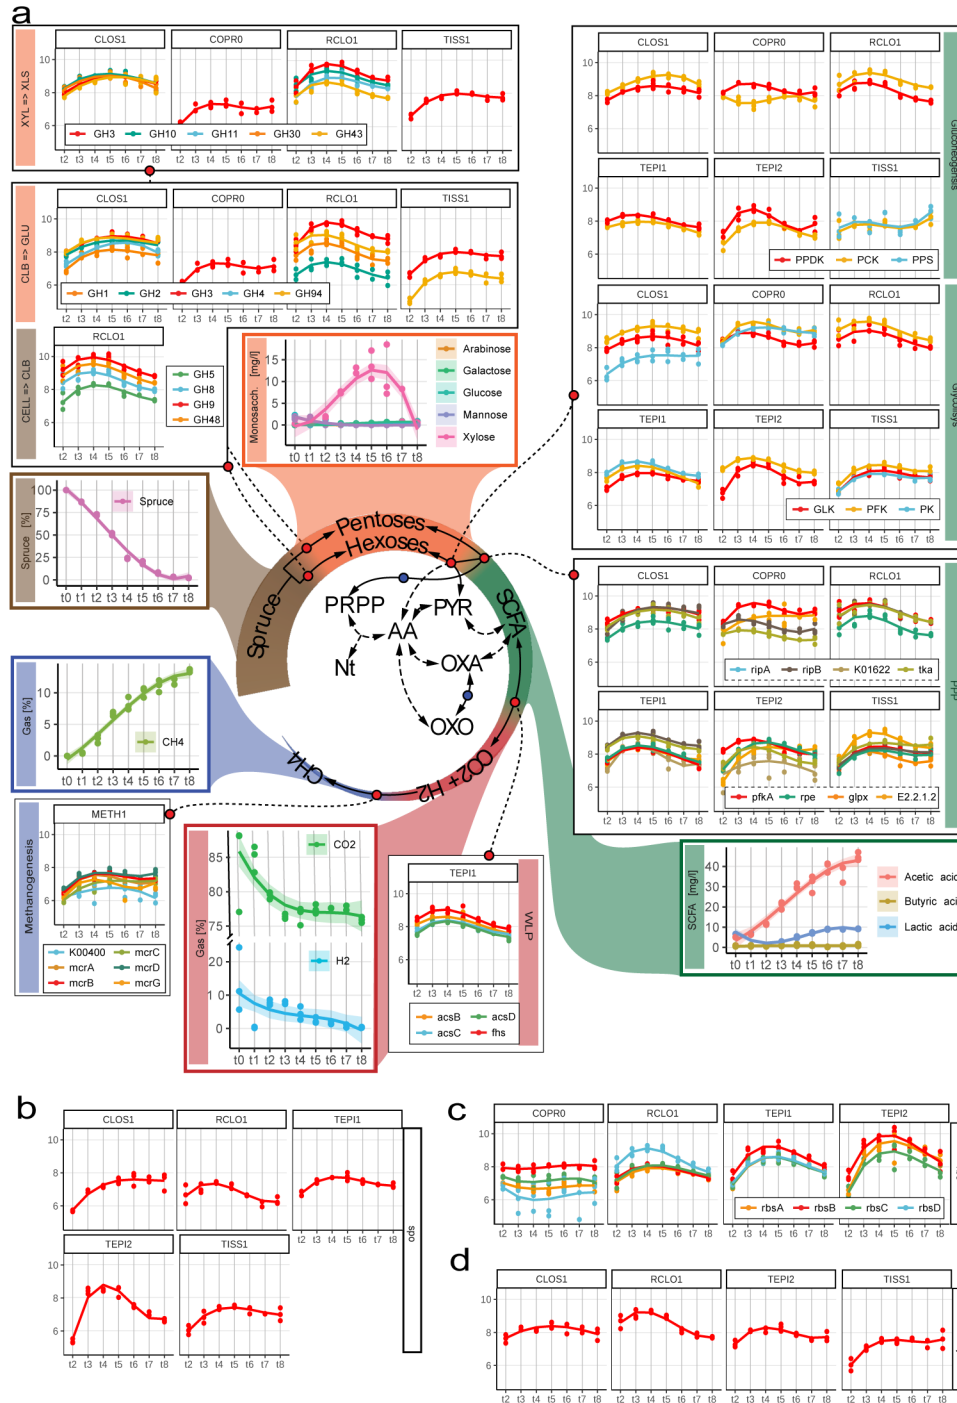

270 **Figure 3. Schematic representation of the temporal and co-dependent metabolism of SEM1b that converts spruce-derived**  
271 **cellulose to methane. a.** Within SEM1b, four major metabolic stages are required: Spruce → Hexoses/Pentoses, Hexoses/Pentoses →  
272 SCFAs, SCFAs → CO<sub>2</sub>+H<sub>2</sub> and CO<sub>2</sub>+H<sub>2</sub> → methane). Metabolites (spruce, sugars, SCFAs, CO<sub>2</sub>+H<sub>2</sub> and methane) involved in these  
273 processes were measured and the temporal analysis of the metabolic pathways involved in their interconversion is depicted for the major  
274 SEM1b populations. Other metabolites (for which abbreviations are: Nt=Nucleotides, PRPP=Phosphoribosyl pyrophosphate, AA=Amino  
275 acids, PYR=Pyruvate, OXA=Oxalacetate and OXO=Oxo-glutarate) are shown to highlight the essential metabolism of the microbes. In  
276 the central metabolic network the metabolites are linked by solid arrows if the interconversion requires one step or the link between them  
277 is addressed more in detail (blue dot if in Fig. 2, red dot if in a pathway plot herein). Metabolic pathways are quantified via marker genes  
278 (selection in methods section) in the scale of log<sub>10</sub>-transformed transcript molecules per sample whilst the solid lines in the plots  
279 represent the cubic fitting of the data points. More metabolites' abbreviations are CELL=Cellulose, CLB=Cellbiose, GLU=Glucose,  
280 XYL=Xylan, XLB=Xylobiose and pathways' abbreviations are WLP="Wood-Ljungdahl Patway", PPP="Pentose Phosphate Pathway".  
281 **b.** Sporulation is common to all Gram positive bacteria of the community and it is quantified with the marker *spoIVA*. Notably TEPI2 is  
282 investing greatly in spore formation until 28h after the inoculum (t4). **c.** The genes for the Ribose and xylose transporter (*rrs*) are  
283 expressed in four populations. Notably TEPI2 produces more *rrs* transcripts than the closely related MAG TEPI1; indeed, the first has  
284 been predicted to be a mere fermenter whilst the latter bases its metabolism on the WLP pathway (Fig. 3a). **d.** Microbial motility is  
285 represented by the marker gene *flgD*. RCLO1 is the most active bacterium, producing less and less flagella over time after t4. It starts  
286 ahead of the others at t2, presumably finishing the colonization of the substrate (Spruce-derived cellulose).

287

288 In microbial ecosystems, acetate oxidization is a syntrophic process, whereby end-products of the WLP  
289 CO<sub>2</sub> and H<sub>2</sub> /formate are co-metabolized by hydrogenotrophs such as Archaeal methanogens. The  
290 methanogenesis pathway encoded in METH1 is the largest pathway according to the number of genes  
291 involved (n=112) in SEM1b, while we also observed transporters for nickel, the metallic ion used by  
292 the nickel-containing methyl-coenzyme M reductase (the central enzyme in methanogenesis<sup>31</sup>).  
293 Methanogenesis also use electrochemical gradients generated by Na<sup>+</sup> and H<sup>+</sup> ions to drive energy  
294 production and recharge the electron donor groups (ferrodoxin, F420), similar to SAO bacteria.  
295 Peculiarly, the populations TEPI1, TEPI2 and TISS1 were the only ones found to encode and express  
296 the Na<sup>+</sup>/H<sup>+</sup> antiporter *nha* (Fig. 2) pointing to an important role of these ions in the greater SEM1b  
297 consortium. The WLP is associated with the transition between NADH/NAD<sup>+</sup>, and translocates Na<sup>+</sup> to  
298 create a gradient, which is used by the type-V ATPase to synthesize ATP<sup>32</sup>. Indeed the NAD<sup>+</sup>-Fd<sub>Red</sub>-  
299 dependent Na<sup>+</sup> translocation system *rnf* is expressed in both the fermenting and SAO bacteria of  
300 SEM1b, while type-V ATPase, which produce energy by exploiting the Na<sup>+</sup>/H<sup>+</sup> gradient, were detected  
301 by all the populations aside from METH1 and *C. proteolyticus* (Fig. 2). Moreover, the TEPI1 MAG  
302 expresses the HND NADP-reducing hydrogenases complex, which turns hydrogen ions into H<sub>2</sub> using  
303 NADPH. The molecular hydrogen can then permeate the membrane and be used by the syntrophic  
304 partner METH1 to generate methane (Fig. 3a).

305

### 306 **Translation control drives changes in cell status and source utilization**

307 In addition to RNA/proteins ratio assessments, our collection of absolute multi-omic data allowed us to  
308 explore the crucial aspect of protein-level regulation, which is poorly understood in microbiomes. The  
309 control of protein levels in bacteria is believed to occur predominately via transcription control,  
310 "control by dilution"<sup>33</sup> (dispersal of proteins via subsequent cell divisions) and rarely by protein

311 degradation<sup>34</sup>. Similar to transcription control, translation can also be controlled by a dynamic pool of  
312 translational factors, such as initiation, elongation and ribosome components<sup>35</sup>. The processes targeted  
313 by these systems require a rapid change in the number of proteins in the cell that cannot wait for a  
314 change in RNA levels or a dilution effect. The absolute quantification of transcripts in SEM1b and  
315 proteins was used to estimate the translation and protein degradation rates using PECA-  
316 R<sup>36</sup> (Supplementary Table 5). The analysis found 305 significant changes in translation rate, accounting  
317 for 302 ORFs. Of the rate changes, 94% were downregulated and 71% of the ORF were functionally  
318 annotated. RCLO1 has 28 downregulated ORFs between 13h and 18h (t2-t3), mostly from complexes  
319 involved in chemotaxis (*cheY*, *cheW*, *mcp*), flagellum assembly (*flgG*, *flgK*, *fliD*) and shape  
320 determination (*mreB*). In the following five hours, several systems concerning carbon fixation are  
321 affected, such as phosphoglycerate kinase (PGK), triosephosphate isomerase (TPI), phosphate  
322 acetyltransferase (EC 2.3.1.8), isocitrate dehydrogenase (IDH1) and *pyruvate* orthophosphate dikinase  
323 (PPDK). In the next five hours it downregulates the translation of the cell division protein zapA as  
324 well. The reduction protein production for chemotaxis, mobility and then cell division matches the idea  
325 that within 13h of the inoculation, RCLO1 sensed, reached and colonized the cellulose fibers.  
326 Contextually the release of medium length carbohydrates enables RCLO1 to engage in the more  
327 energetically favorable fermentation metabolism. TISS1 has a decrease in translation rates of ORFs  
328 related to metabolic processes between 13h and 18h, mostly involving cofactors (*fhs*, *folC*, *folD*, *lplA*,  
329 *metH*, *pdu0* and *nadE*) and amino acids (*aorQ*, *hutI*, LDH, *metH*, *mtaD* and *pip*). TEPI1 down-  
330 regulated 60 ORFs, accounting for part of its carbohydrate metabolism (e.g. PGK, TPI), the amino acid  
331 transporters and the NADH dehydrogenase complex (HND). TEPI2 has 19 ORFs subject to  
332 downregulation in the 13h-18h interval, such as Pyruvate ferredoxin oxidoreductase (PFOR), GK,  
333 fructose-bisphosphate aldolase (FBA), tansaldolase EC 2.2.1.2 and the ribose/xylose transporter  
334 subunit *rbsB*. In the last interval (33h-38h), RCLO1 upregulated the translation of 10 ORFs, among  
335 which the flagellar flbD and shape determination *mreB*; seemingly starting to restore the functions  
336 downregulated in the 13h-18h interval.

337

## 338 **Conclusions**

339 We present the reconstruction of a microbiome from a model environment and quantified the number  
340 of RNAs and proteins over time in absolute terms. This approach enabled us to assess and report, for  
341 the first time, the protein-to-RNA ratio of multiple microbial populations simultaneously, which  
342 individually engage in distinct, yet integrative metabolic pathways that ultimately cumulate into the



343 community's principal phenotype of converting cellulose to methane. We extended the results from  
344 Taniguchi et al.<sup>1</sup>, showing that our populations had a varying protein-to-RNA ratio in the predicted  
345 interval of  $10^2$ - $10^4$  while presenting for the first time the same quantity for an Archaeal population  
346 (METH1):  $10^3$ - $10^5$ , which resembled the previously measured values for Eukaryotes<sup>20-23</sup>. The greater  
347 ecological significance of the seeming Archaeal capacity to generate higher protein levels at a lower  
348 "RNA-cost" is of interest, as many Archaeal populations in mixed-kingdom microbiomes are known to  
349 exert strong functional influence, despite their cell concentrations being orders of magnitude lower than  
350 their bacterial counterparts (i.e. the rumen microbiome<sup>37</sup>).

351

352 Moreover, we assessed the linearity between transcriptome and proteome for each population over time  
353 (Eq.1), finding that three major populations of the community, a fermenter (CLOS1), a SAO (TEPI1)  
354 and a methanogen (METH1), were converging on the same values in parallel with the primary cellulose  
355 degrader (RCLO1) (Fig. 1d). The highlight of their seemingly intertwined protein/RNA dynamics  
356 matches with their metabolic complementarity, starting from RCLO1 degrading cellulose to sugars and  
357 SCFAs, CLOS1 fermenting sugars to SCFA, TEPI1 oxidizing SCFAs to H<sub>2</sub> and METH1 converting  
358 CO<sub>2</sub> and H<sub>2</sub> to methane. Closer examination revealed even more intricate relationships involving Na<sup>+</sup>  
359 and H<sup>+</sup> ions as well as secondary sugars (i.e. xylose) reiterating that each population needs the  
360 metabolic activity and subsequent byproducts of the previous one to provide a supply of growing  
361 metabolites (Fig. 3a). Moreover, the estimation of translation and protein degradation rates pointed at a  
362 translational negative control for several ORFs involved in chemotaxis/motility and central  
363 metabolism, marking important changes in the community status. In conclusion, our data highlights  
364 that simple modifications to multi-omics toolkits can reveal much deeper functional-related trends and  
365 integrative co-dependent metabolisms that drive the overall phenotype of microbial communities, with  
366 potential to be expanded to more-complex and less-characterized microbial ecosystems.

367

### 368 **Data availability**

369 All sequencing reads have been deposited in the sequence read archive (SRP134228), with specific numbers  
370 listed in Supplementary Table 6 in Kunath et al.<sup>9</sup>. All microbial genomes are publicly available on JGI  
371 under the analysis project numbers listed in Supplementary Table 6 in Kunath et al.<sup>9</sup>. The mass  
372 spectrometry proteomics data have been deposited to the ProteomeXchange Consortium via the  
373 PRIDE<sup>38</sup> partner repository with the dataset identifier PXD016242. The code used to perform the  
374 computational analysis is available at: <https://github.com/fdelogu/SEM1b-Multiomics>.

375



## 376 **Acknowledgements**

377 We are grateful for support from The Research Council of Norway (FRIPRO program, PBP: 250479),  
378 as well as the European Research Commission Starting Grant Fellowship (awarded to PBP; 336355 -  
379 MicroDE). The sequencing service was provided by the Norwegian Sequencing Centre  
380 ([www.sequencing.uio.no](http://www.sequencing.uio.no)), a national technology platform hosted by the University of Oslo and  
381 supported by the “Functional Genomics” and “Infrastructure” programs of the Research Council of  
382 Norway and the Southeastern Regional Health Authorities.

383

## 384 **Author contributions**

385 F.D., T.R.H. and P.B.P. conceived the study, performed the primary analysis of the data and wrote the  
386 paper (with input from all authors). B.J.K., and M.Ø.A. generated the data and contributed to the data  
387 analyses.

388

## 389 **Competing interests**

390 The authors declare there are no competing financial interests in relation to the work described.

391

392

## 393 **Materials and Methods**

394

### 395 **Multomics data acquisition**

396

397 **Background** The full experimental setup and the methods concerning the retrieval of biological  
398 samples and data preprocessing were performed during a previous study<sup>9</sup> and can be summarized as  
399 follows: a microbial consortium called SEM1b was obtained from a biogas reactor using serial dilution  
400 and enrichment methods on spruce cellulose. A metagenomic analysis was initially performed on the  
401 SEM1b community using two different generations that had consistent population structure, and was  
402 used as a supporting database for a subsequent SEM1b time series experiment. The time series analyses  
403 consisted of metabolomics, metaproteomics and metatranscriptomics over nine time points (at t0, 8, 13,  
404 18, 23, 28, 33, 38 and 43 hours) in triplicate (A, B and C), spanning the consortium life-cycle.

405

406 **Metagenomics** For generation of metagenomic data, 6ml samples of SEM1b culture were taken and  
407 cells were pelleted prior to storage at -20°C. Non-invasive DNA extraction methods were used to

408 extract high molecular weight DNA as previously described in Kunath et al.<sup>39</sup>. DNA samples were  
409 prepared with the TrueSeq DNA PCR-free preparation, and sequenced with paired-ends (2x125bp) on  
410 one lane of an Illumina HiSeq3000 platform (Illumina Inc) at the Norwegian Sequencing Center (NSC,  
411 Oslo, Norway). Metagenomic analyses comprising quality trimming and filtering, reads assembly,  
412 binning and annotations were performed as previously described<sup>9</sup>. Resulting annotated open reading  
413 frames (ORFs) were retrieved and used as a reference database for the metatranscriptomic and  
414 metaproteomic analysis.

415

416 **Metatranscriptomics** mRNA extraction was performed in triplicate on time points t2 to t8, using  
417 previously described methods<sup>11</sup>. The extraction of the mRNA included the addition of an in vitro  
418 transcribed RNA as an internal standard to estimate the number of transcripts in the natural sample  
419 compared with the number of transcripts sequenced. For further normalization, total RNA was  
420 extracted using enzymatic lysis and mechanical disruption of the cells and purified with the RNeasy  
421 mini kit (Protocol 2, Qiagen, USA). The RNA standard (25ng) was added at the beginning of the  
422 extraction in every sample. After purification, residual DNA, free nucleotides and small RNAs were  
423 removed. Samples were treated to enrich for mRNAs and then amplified before being sent for  
424 sequencing at the Norwegian Sequencing Center (NSC, Oslo, Norway). Samples were subjected to  
425 the TruSeq stranded RNA sample preparation, which included the production of a cDNA library, and  
426 sequenced with paired-end technology (2x125bp) on one lane of a HiSeq 3000 system.

427

428 The resulting sequences were filtered and rRNA and tRNA reads were removed as performed in  
429 Kunath et al.<sup>9</sup>. The reads mapping on the internal standard pGEM-3Z were extracted using  
430 SortMeRNA<sup>40</sup> v2.1b and their counts used as  $I_R$  in the “Functional omics absolute quantification”  
431 section of the material and Methods, whilst the not mapping reads (the transcriptome in the sample)  
432 were used as  $\sum T_R$ . The retained reads were mapped against the predicted genes dataset using Kallisto  
433 pseudo-pseudobam<sup>41</sup> and the mapping files were produced with bam2hits. Transcripts were quantified  
434 with mmseq<sup>42</sup> and collapsed using mmcollapse<sup>43</sup>.

435

436 **Metaproteomics** Proteins were extracted from t1 to t8 in triplicate following a previously described  
437 method<sup>44</sup> with a few modifications. Briefly, 30ml of cultures containing cells and substrate were  
438 centrifuged at 500x g for 5 minutes to pellet the substrate. The supernatant was centrifuged at 9000 x g  
439 for 15 minutes to collect the cells. Cell lysis was performed by resuspending the cells in 1ml lysis  
440 buffer (50 mM Tris-HCl, 0.1% (v/v) Triton X-100, 200 mM NaCl, 1 mM DTT, 2mM EDTA) and

441 keeping them on ice for 30 minutes. Cells were disrupted in 3 x 60 seconds cycles using a FastPrep24  
442 (MP Biomedicals, USA). Debris were removed by centrifugation at 16000 x g for 15 minutes. The  
443 supernatants containing the proteins were kept at -20°C until further processing. Extracted proteins  
444 were quantified using the Bradford's method. 50µg of each sample were denatured using SDS sample  
445 buffer and loaded on an Any-kD Mini-PROTEAN gel (Bio-Rad Laboratories, USA) and separated by  
446 SDS-PAGE for 20 minutes at 270V. Each gel lane was cut into 16 slices and the reduction, alkylation  
447 and tryptic digestion of the proteins into peptides were performed in-gel. The tryptic peptides were  
448 extracted from the gel and desalted prior to mass spectrometry analysis. Peptides were analyzed using a  
449 nanoLC-MS/MS system connected to a Q-Exactive hybrid quadrupole-orbitrap mass spectrometer  
450 (Thermo Scientific, Germany) equipped with a nano-electrospray ion source. The Q-Exactive mass  
451 spectrometer was operated in data-dependent mode and the 10 most intense peptide precursor ions  
452 were selected for fragmentation and MS/MS acquisition. The selected precursor ions were then  
453 excluded for repeated fragmentation for 20 seconds. The resolution was set to R=70,000 and R=35,000  
454 for MS and MS/MS, respectively.

455

456 A total of 384 raw MS files (8 samples x 3 biological replicates x 16 fractions) were analyzed using  
457 MaxQuant<sup>45</sup> version 1.4.1.2 and proteins were identified and quantified using the MaxLFQ algorithm<sup>46</sup>.  
458 The data was searched against the generated MG dataset from Kunath et al.<sup>9</sup> supplemented with  
459 common contaminants such as human keratin and bovine serum albumin. In addition, reversed  
460 sequences of all protein entries were concatenated to the database for estimation of false discovery  
461 rates. The tolerance levels for matching to the database was 6 ppm for MS and 20 ppm for MS/MS.  
462 Trypsin was used as digestion enzyme, and two missed cleavages were allowed. Carbamidomethylation  
463 of cysteine residues was set as a fixed modification and protein N-terminal acetylation, oxidation of  
464 methionines, deamidation of asparagines and glutamines and formation of pyro-glutamic acid at N-  
465 terminal glutamines were allowed as variable modifications. The 'match between runs' feature of  
466 MaxQuant<sup>46</sup> was applied. All identifications were filtered in order to achieve a protein false discovery  
467 rate (FDR) of 1%. Quantitative information was retrieved using the LFQ intensities of each proteins.

468

469 **Metabolomics** For monosaccharide detection, 2 ml samples were taken in triplicates, filtered and  
470 sterilized with 0.2µm sterile filters and 15 minutes boiling. Soluble sugars were identified and  
471 quantified by high-performance anion exchange chromatography (HPAEC) with pulsed amperometric  
472 detection (PAD). For quantification, peaks were compared to linear standard curves generated with

473 known concentrations of selected monosaccharides (glucose, xylose, mannose, arabinose and  
474 galactose) in the range of 0.001-0.1 g/L.

475  
476 For the short chain fatty acids (SCFAs), 1ml was taken in triplicate from each time point, they were  
477 centrifuged at 16000 x g for 5 minutes and the supernatants were filtered with 0.2µm sterile filters. 5µL  
478 of Sulfuric Acid 72% were added to the filtrates and let at rest for 2 minutes before being centrifuged  
479 again at 16000 x g for 5 minutes, transferred in a new tube and stored at -20°C until processing. SCFAs  
480 were then analyzed using a Dionex 3000 HPLC as described in Estevez et al.<sup>47</sup>.

## 481 482 **Functional omics absolute quantification**

483 **Metatranscriptomics** The absolute quantification of transcripts was taken from Mortazavi et  
484 al.<sup>10</sup> using the internal standard from Gifford et al.<sup>11</sup> as reference to estimate the length of the initial  
485 transcriptome. The number of reads produced in a given sample is proportional to the total amount (in  
486 Nt) of starting material. With the addition of an internal standard we have the following proportion  
487 between the starting material for transcripts ( $T_{Nt}$ ) and the internal standard ( $I_{Nt}$ ) and the reads they  
488 produce ( $T_R$  and  $I_R$  respectively):

$$489 \quad \frac{\sum T_{Nt}}{\sum T_R} = \frac{\sum I_{Nt}}{I_R},$$

490 in which the sums are taken over a single sample. The formula can be rearranged as:

$$491 \quad \sum T_{Nt} = \sum I_{Nt} \times \frac{\sum T_R}{I_R}.$$

492 Since we know the number of molecules of internal standard added ( $I_M$ ) and its length ( $I_{Nt}$ ), we can  
493 substitute them in the equation as:

$$494 \quad \sum T_{Nt} = I_M \times I_{Nt} \times \frac{\sum T_R}{I_R}.$$

495 We can now use the estimation of the starting length of the transcriptome and the TPMK transcript  
496 measurements in the formula from Mortazavi et al.<sup>10</sup>:

$$497 \quad T_M = \frac{T_{RPMK}}{10^9} \times \sum T_{Nt},$$

498 which becomes:

$$499 \quad T_M = \frac{T_{RPMK}}{10^9} \times I_M \times I_{Nt} \times \frac{\sum T_R}{I_R}.$$

500

501 **Metaproteomics** The “Total protein approach” method from Wiśniewski et al.<sup>12</sup> relies on the use of the  
502 protein mass per sample, the computed Molecular Weight (MW) of the detected proteins to transform  
503 the LFQ values into absolute ones. Here we omitted the per-cell quantification since SEM1b is a  
504 heterogeneous community and MG measurements were not taken for the time series.

505 We computed the *Total protein<sub>i</sub>* as:

$$506 \quad Total\ protein_i = \frac{LFQ\ intensity_i}{\sum LFQ\ intensity}$$

507 Then the *Protein concentration<sub>i</sub>* was obtained from the previous with:

$$508 \quad Protein\ concentration_i = \frac{Total\ protein_i}{MW_i}$$

509 The method was developed on the assumption that the reference proteome is complete and that the total  
510 mass of the peptides detected is equal to the total mass of peptides processed by the machine. This is  
511 not necessarily valid in a microbiome for which the reference cannot be completely reliable. Thus we  
512 computed the fraction of identified mass using the raw MP files with the following formula:

$$513 \quad Detected\ protein\ mass = \frac{Total\ protein\ mass \times \sum_{i=1}^{Pep_{det}} Base\ peak\ intensity_i \times Mass_i}{\sum_{j=1}^{Pep_{tot}} Base\ peak\ intensity_j \times Mass_j}$$

514 Finally the copy number of proteins per sample was computed using the Avogadro’s Number ( $N_A$ ) as:

$$515 \quad Copy\ number_i = Protein\ concentration_i \times Detected\ protein\ mass \times N_A$$

516

## 517 **Multomics dataset integration**

518 **Data preprocessing** The MT and MP datasets estimate absolute abundance of ORFGs over time. An  
519 expression group is defined in this study as a set of ORFs which cannot be further resolved using the  
520 available data. When the analysis required the direct comparison of ORFs (e.g. transcript-protein  
521 correlation) only the singleton subset of the ORFGs was considered. The reliability of the expression  
522 estimation is linked to the number of unique hits (reads or peptides) available for a given ORF,  
523 therefore all the entries with 0 unique hits were filtered out. The datasets were then log10-transformed  
524 with a pseudocount equal to one. After expression density plotting, the minimum expression thresholds  
525 of 5 and 9 were selected for MT and MP, respectively, and the data was filtered accordingly. Principal  
526 component analysis was used to screen the samples and t7C (time point 7, replicate C) was identified as  
527 an outlier and removed before downstream analysis.

528

529 **MP/MT linear fit** We took the intersection of ORFs present in the MT and MP layers of the dataset for  
530 each of the selected MAGs (COPR1, CLOS1, COPR1, METH1, RCLO1, TEPI1, TEPI2, TISS1), and,  
531 for each sample, we performed a regression analysis in R. The values span several orders of  
532 magnitudes, thus we decided to fit the monomial functional:

$$533 \quad \text{protein} = a \cdot \text{RNA}^k$$

534 which can be rewritten as:

$$535 \quad \log(\text{protein}) = a + k \cdot \log(\text{RNA})$$

536 to be more easily fitted as a linear model. The previously log10 transformed protein levels were used as  
537  $y$  while the log10-transformed RNA was used as  $x$  in a linear model using the `lm` function. The slopes  
538 of the models were then used to fit a third grade polynomial function to obtain the linearity change  
539 profile in Fig. 1d.

540

541 **Functional annotation and module completeness** The KEGG Orthology (KO) numbers were  
542 assigned to the ORFs as a part of the annotation pipeline from IMG<sup>48</sup>. The ORF-wise annotation was  
543 then translated into the MT/MP-ORFGs assigning to each ORFG a non-redundant set of all the terms  
544 assigned to all the ORFs in the group. We used the KO numbers to estimate the KEGG module  
545 completeness using the R package `MetaQy`<sup>49</sup> v.1.1.0. The Glycosyl Hydrolases annotation was  
546 retrieved from Kunath et al.<sup>9</sup>.

547

548 **Metabolic marker genes selection** The metabolic marker genes for Fig. 2 were selected with the  
549 following criterion. Glycolysis/Gluconeogenesis: enzyme with irreversible reactions. PPP: genes  
550 involved in the main interconversion loop between Ribose-5 Phosphate and Fructose-6 Phosphate.  
551 WLP: marker genes from Can 2014. Methanogenesis: markers genes from Scheller 2010. The Glycosyl  
552 Hydrolases were manually curated to assemble a set able to perform the substrate conversion.

553

554 **PECA analysis** We ran PECA-R<sup>36</sup> to estimate translation and protein degradation rates using the  
555 absolute quantification tables for transcripts and proteins with default parameters. The rates are  
556 estimated between two consecutive time points, therefore the sample from 8h was not included because  
557 it is missing the corresponding MT data. We filtered the results to identify the changing point using a  
558 score threshold of 0.9 and a FDR equal to 0.05.

559

560 **Figures**



561

562 **Figure 1. Protein-to-RNA ratio distributions of as-yet uncultured bacterial and archaeal**  
563 **populations within a microbial community. a.** Comparison of protein-to-RNA ratio distributions of  
564 selected MAGs reconstructed from the SEM1b community as well as those previously reported in the  
565 literature. The dots represent the median values and the bars span from the first to the third quartiles.  
566 The protein-to-RNA ratios for *E.coli* was retrieved from Taniguchi et al.<sup>1</sup>, Yeast1 from  
567 Ghaemmaghami et al.<sup>20</sup>, Yeast2 from Lu et al.<sup>21</sup>, Human1 from Schwanhauser et al.<sup>22</sup> and Human2  
568 from Li et al.<sup>23</sup>. **b.** The distribution of the Pearson Correlation Coefficients (PCC) between transcripts  
569 and their corresponding proteins computed across the time points. With a median PCC of 0.41, the  
570 change in the amount of a given transcript over time seemingly does not translate into a change in the  
571 amount of the corresponding protein. **c.** Per-time-point scatterplots of the absolute protein and  
572 transcript levels for ORFs that produced both detectable transcript and protein in SEM1b datasets. For  
573 simplicity, only four representative MAGs are shown, with all MAGs depicted in Supplementary Fig.  
574 2. **d.** The plot shows how the linearity parameter  $k$  between RNA and protein changes over time for the  
575 different MAGs. The linearity represents how a change in RNA level is reflected in a change in the  
576 corresponding protein level. The parameter ranges from 0 to 1, and increasingly smaller values  
577 translate in fewer proteins being expected for the same level of RNAs. The populations CLOS1,  
578 METH1 and TEPI1 are converging towards the same values, while RCLO1 has a parallel trend.  
579 Hinting to the existence, and the reaching of an equilibrium among them.

580

581 **Figure 2. Overview of the genetic potential and expressed modules in the seven populations of**  
582 **SEM1b.** Module completeness denotes the level of detected RNA and proteins mapped to major  
583 genes/metabolic pathways that are critical to the SEM1b lifecycle. Only MAGs with the highest quality  
584 reconstruction (RCLO1, CLOS1, COPR1, TISS1, TEPI1, TEPI2 and METH1) are included as well as  
585 two isolated and genome-sequenced *Coprothermobacter* strains, for which the transcriptome and the  
586 proteome were considered as the species level.

587

588 **Figure 3. Schematic representation of the temporal and co-dependent metabolism of SEM1b that**  
589 **converts spruce-derived cellulose to methane. a.** Within SEM1b, four major metabolic stages are  
590 required: Spruce  $\rightarrow$  Hexoses/Pentoses, Hexoses/Pentoses  $\rightarrow$  SCFAs, SCFAs  $\rightarrow$  CO<sub>2</sub>+H<sub>2</sub> and CO<sub>2</sub>+H<sub>2</sub>  
591  $\rightarrow$  methane). Metabolites (spruce, sugars, SCFAs, CO<sub>2</sub>+H<sub>2</sub> and methane) involved in these processes  
592 were measured and the temporal analysis of the metabolic pathways involved in their interconversion is

593 depicted for the major SEM1b populations. Other metabolites (for which abbreviations are:  
594 Nt=Nucleotides, PRPP=Phosphoribosyl pyrophosphate, AA=Amino acids, PYR=Pyruvate,  
595 OXA=Oxalacetate and OXO=Oxo-glutarate) are shown to highlight the essential metabolism of the  
596 microbes. In the central metabolic network the metabolites are linked by solid arrows if the  
597 interconversion requires one step or the link between them is addressed more in detail (blue dot if in  
598 Fig. 2, red dot if in a pathway plot herein). Metabolic pathways are quantified via marker genes  
599 (selection in methods section) in the scale of log<sub>10</sub>-transformed transcript molecules per sample whilst  
600 the solid lines in the plots represent the cubic fitting of the data points. More metabolites' abbreviations  
601 are CELL=Cellulose, CLB=Cellbiose, GLU=Glucose, XYL=Xylan, XLB=Xylobiose and pathways'  
602 abbreviations are WLP="Wood-Ljungdahl Patway", PPP="Pentose Phosphate Pathway". **b.**  
603 Sporulation is common to all Gram positive bacteria of the community and it is quantified with the  
604 marker *spoIVA*. Notably TEPI2 is investing greatly in spore formation until 28h after the inoculum (t<sub>4</sub>).  
605 **c.** The genes for the Ribose and xylose transporter (*rbs*) are expressed in four populations. Notably  
606 TEPI2 produces more *rbs* transcripts than the closely related MAG TEPI1; indeed, the first has been  
607 predicted to be a mere fermenter whilst the latter bases its metabolism on the WLP pathway (Fig. 3a).  
608 **d.** Microbial motility is represented by the marker gene *flgD*. RCLO1 is the most active bacterium,  
609 producing less and less flagella over time after t<sub>4</sub>. It starts ahead of the others at t<sub>2</sub>, presumably  
610 finishing the colonization of the substrate (Spruce-derived cellulose).

611

## 612 References

- 613 1. Taniguchi, Y. *et al.* Quantifying E. coli proteome and transcriptome with single-molecule  
614 sensitivity in single cells. *Science* (80-. ). **329**, 533–538 (2010).
- 615 2. Venter, J. C. *et al.* Environmental genome shotgun sequencing of the Sargasso Sea. *Science* **304**,  
616 66–74 (2004).
- 617 3. Human Microbiome Project Consortium. Structure, function and diversity of the healthy human  
618 microbiome. *Nature* **486**, 207–14 (2012).
- 619 4. Shi, Y., Tyson, G. W. & DeLong, E. F. Metatranscriptomics reveals unique microbial small  
620 RNAs in the ocean's water column. *Nature* **459**, 266–269 (2009).
- 621 5. Muller, E. EL, Sheik, A. R. & Wilmes, P. Lipid-based biofuel production from wastewater.  
622 *Curr. Opin. Biotechnol.* **30**, 9–16 (2014).
- 623 6. Dewi Puspita, I., Kamagata, Y., Tanaka, M., Asano, K. & Nakatsu, C. H. Are Uncultivated  
624 Bacteria Really Uncultivable? *Microbes Environ.* **27**, 356–366 (2012).

- 625 7. Lovell, D., Pawlowsky-Glahn, V., Egozcue, J. J., Marguerat, S. & Bähler, J. Proportionality: A  
626 Valid Alternative to Correlation for Relative Data. *PLoS Comput. Biol.* **11**, e1004075 (2015).
- 627 8. Vogel, C. & Marcotte, E. M. Insights into the regulation of protein abundance from proteomic  
628 and transcriptomic analyses. *Nat. Rev. Genet.* **13**, 227–232 (2012).
- 629 9. Kunath, B. J. *et al.* From proteins to polysaccharides: lifestyle and genetic evolution of  
630 *Coprothermobacter proteolyticus*. *ISME J.* **13**, 603–617 (2019).
- 631 10. Mortazavi, A., Williams, B. A., McCue, K., Schaeffer, L. & Wold, B. Mapping and quantifying  
632 mammalian transcriptomes by RNA-Seq. *Nat. Methods* **5**, 621–628 (2008).
- 633 11. Gifford, S. M., Sharma, S., Rinta-Kanto, J. M. & Moran, M. A. Quantitative analysis of a deeply  
634 sequenced marine microbial metatranscriptome. *ISME J.* **5**, 461–472 (2011).
- 635 12. Wiśniewski, J. R. & Rakus, D. Multi-enzyme digestion FASP and the 'Total Protein Approach'-  
636 based absolute quantification of the *Escherichia coli* proteome. *J. Proteomics* **109**, 322–31  
637 (2014).
- 638 13. Benelli, D., La Teana, A. & Londei, P. Translation Regulation: The Archaea-Eukaryal  
639 Connection. in (2017). doi:10.1007/978-3-319-65795-0\_3.
- 640 14. Achinas, S., Achinas, V. & Euverink, G. J. W. A Technological Overview of Biogas Production  
641 from Biowaste. *Engineering* (2017) doi:10.1016/J.ENG.2017.03.002.
- 642 15. Caro-Quintero, A. & Konstantinidis, K. T. Bacterial species may exist, metagenomics reveal.  
643 *Environmental Microbiology* (2012) doi:10.1111/j.1462-2920.2011.02668.x.
- 644 16. Sharon, I. *et al.* Time series community genomics analysis reveals rapid shifts in bacterial  
645 species, strains, and phage during infant gut colonization. *Genome Res.* **23**, 111–20 (2013).
- 646 17. Albertsen, M. *et al.* Genome sequences of rare, uncultured bacteria obtained by differential  
647 coverage binning of multiple metagenomes. *Nat. Biotechnol.* **31**, 533–538 (2013).
- 648 18. Leary, D. H., Hervey, W. J., Deschamps, J. R., Kusterbeck, A. W. & Vora, G. J. Which  
649 metaproteome? The impact of protein extraction bias on metaproteomic analyses. *Mol. Cell.*  
650 *Probes* **27**, 193–199 (2013).
- 651 19. Marguerat, S. *et al.* Quantitative analysis of fission yeast transcriptomes and proteomes in  
652 proliferating and quiescent cells. *Cell* **151**, 671–83 (2012).
- 653 20. Ghaemmaghami, S. *et al.* Global analysis of protein expression in yeast. *Nature* **425**, 737–41  
654 (2003).
- 655 21. Lu, P., Vogel, C., Wang, R., Yao, X. & Marcotte, E. M. Absolute protein expression profiling  
656 estimates the relative contributions of transcriptional and translational regulation. *Nat.*  
657 *Biotechnol.* **25**, 117–124 (2007).

- 658 22. Schwanhäusser, B. *et al.* Global quantification of mammalian gene expression control. *Nature*  
659 **473**, 337–42 (2011).
- 660 23. Li, J. J., Bickel, P. J. & Biggin, M. D. System wide analyses have underestimated protein  
661 abundances and the importance of transcription in mammals. *PeerJ* **2**, e270 (2014).
- 662 24. Shachrai, I., Zaslaver, A., Alon, U. & Dekel, E. Cost of Unneeded Proteins in *E. coli* Is Reduced  
663 after Several Generations in Exponential Growth. *Mol. Cell* **38**, 758–767 (2010).
- 664 25. Wang, P. *et al.* Robust growth of *Escherichia coli*. *Curr. Biol.* **20**, 1099–103 (2010).
- 665 26. Liu, Y., Beyer, A. & Aebersold, R. On the Dependency of Cellular Protein Levels on mRNA  
666 Abundance. *Cell* **165**, 535–50 (2016).
- 667 27. Dumitrache, A. D., Wolfaardt, G., Allen, G., Liss, S. N. & Lynd, L. R. Form and function of  
668 *Clostridium thermocellum* biofilms. *Appl. Environ. Microbiol.* **79**, 231–239 (2013).
- 669 28. Artzi, L., Bayer, E. A. & Moraïs, S. Cellulosomes: bacterial nanomachines for dismantling plant  
670 polysaccharides. *Nat. Rev. Microbiol.* **15**, 83–95 (2017).
- 671 29. Park, J. O. *et al.* Synergistic substrate cofeeding stimulates reductive metabolism. *Nat. Metab.*  
672 (2019) doi:10.1038/s42255-019-0077-0.
- 673 30. Galperin, M. Y. *et al.* Genomic determinants of sporulation in Bacilli and Clostridia: Towards  
674 the minimal set of sporulation-specific genes. *Environ. Microbiol.* (2012) doi:10.1111/j.1462-  
675 2920.2012.02841.x.
- 676 31. Scheller, S., Goenrich, M., Boecher, R., Thauer, R. K. & Jaun, B. The key nickel enzyme of  
677 methanogenesis catalyses the anaerobic oxidation of methane. *Nature* (2010)  
678 doi:10.1038/nature09015.
- 679 32. Bertsch, J., Öppinger, C., Hess, V., Langer, J. D. & Müller, V. Heterotrimeric NADH-oxidizing  
680 methylenetetrahydrofolate reductase from the acetogenic bacterium *Acetobacterium woodii*. *J.*  
681 *Bacteriol.* (2015) doi:10.1128/JB.00048-15.
- 682 33. Cai, L., Friedman, N. & Xie, X. S. Stochastic protein expression in individual cells at the single  
683 molecule level. *Nature* **440**, 358–62 (2006).
- 684 34. Maurizi, M. R. Proteases and protein degradation in *Escherichia coli*. *Experientia* **48**, 178–201  
685 (1992).
- 686 35. Rodnina, M. V. Translation in Prokaryotes. *Cold Spring Harb. Perspect. Biol.* **10**, a032664  
687 (2018).
- 688 36. Teo, G., Vogel, C., Ghosh, D., Kim, S. & Choi, H. PECA: a novel statistical tool for  
689 deconvoluting time-dependent gene expression regulation. *J. Proteome Res.* **13**, 29–37 (2014).
- 690 37. Janssen, P. H. & Kirs, M. Structure of the archaeal community of the rumen. *Applied and*  
691 *Environmental Microbiology* (2008) doi:10.1128/AEM.02812-07.

- 692 38. Perez-Riverol, Y. *et al.* The PRIDE database and related tools and resources in 2019: Improving  
693 support for quantification data. *Nucleic Acids Res.* (2019) doi:10.1093/nar/gky1106.
- 694 39. Kunath, B. J., Bremges, A., Weimann, A., McHardy, A. C. & Pope, P. B. Metagenomics and  
695 CAZyme discovery. in *Methods in Molecular Biology* (2017). doi:10.1007/978-1-4939-6899-  
696 2\_20.
- 697 40. Kopylova, E., Noé, L. & Touzet, H. SortMeRNA: Fast and accurate filtering of ribosomal RNAs  
698 in metatranscriptomic data. *Bioinformatics* (2012) doi:10.1093/bioinformatics/bts611.
- 699 41. Bray, N. L., Pimentel, H., Melsted, P. & Pachter, L. Near-optimal probabilistic RNA-seq  
700 quantification. *Nat. Biotechnol.* **34**, 525–527 (2016).
- 701 42. Turro, E. *et al.* Haplotype and isoform specific expression estimation using multi-mapping  
702 RNA-seq reads. *Genome Biol.* (2011) doi:10.1186/gb-2011-12-2-r13.
- 703 43. Turro, E., Astle, W. J. & Tavaré, S. Flexible analysis of RNA-seq data using mixed effects  
704 models. *Bioinformatics* **30**, 180–188 (2014).
- 705 44. Hagen, L. H. *et al.* Quantitative metaproteomics highlight the metabolic contributions of  
706 uncultured phylotypes in a thermophilic anaerobic digester. *Appl. Environ. Microbiol.* **83**,  
707 (2017).
- 708 45. Cox, J. & Mann, M. MaxQuant enables high peptide identification rates, individualized p.p.b.-  
709 range mass accuracies and proteome-wide protein quantification. *Nat. Biotechnol.* **26**, 1367–  
710 1372 (2008).
- 711 46. Cox, J. *et al.* Accurate Proteome-wide Label-free Quantification by Delayed Normalization and  
712 Maximal Peptide Ratio Extraction, Termed MaxLFQ. *Mol. Cell. Proteomics* **13**, 2513–2526  
713 (2014).
- 714 47. Estevez, M. M., Sapci, Z., Linjordet, R. & Morken, J. Incorporation of fish by-product into the  
715 semi-continuous anaerobic co-digestion of pre-treated lignocellulose and cow manure, with  
716 recovery of digestate's nutrients. *Renew. Energy* (2014) doi:10.1016/j.renene.2014.01.001.
- 717 48. Chen, I. M. A. *et al.* IMG/M: Integrated genome and metagenome comparative data analysis  
718 system. *Nucleic Acids Res.* (2017) doi:10.1093/nar/gkw929.
- 719 49. Martinez-Vernon, A. S., Farrell, F. & Soyer, O. S. MetQy — An R package to query metabolic  
720 functions of genes and genomes. *Bioinformatics* (2018) doi:10.1093/bioinformatics/bty447.
